# Supplementary material for: The Vitamin D Analog, MART-10, Attenuates Triple Negative Breast Cancer Cells Metastatic Potential
Source: PubMed Central journal article supplement (PMC4849057; doi:10.3390/ijms17040606), 2016-04-21
Supplement: ijms-17-00606-s001.pdf [file ijms-17-00606-s001.pdf]

## Supplementary Materials: The Vitamin D Analog, MART-10, Attenuates Triple Negative Breast Cancer Cells Metastatic Potential

Kun-Chun Chiang, Ta-Sen Yeh, Shin-Cheh Chen, Jong-Hwei S. Pang, Chun-Nan Yeh, Jun-Te Hsu, Li-Wei Chen, Sheng-Fong Kuo, Masashi Takano, Atsushi Kittaka, Tai C. Chen, Chi-Chin Sun and Horng-Heng Juang

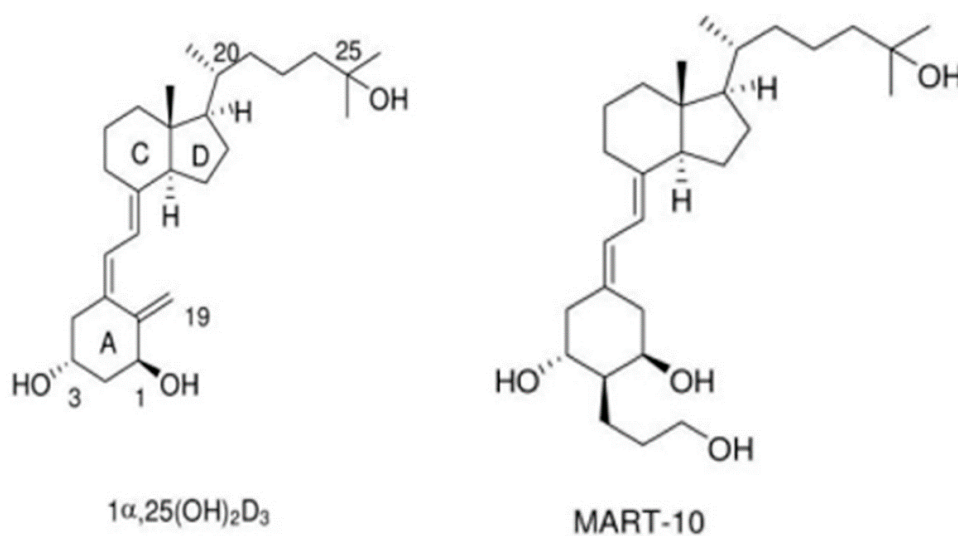

Figure S1. Structure for  $1\alpha,25(\text{OH})_2\text{D}_3$  and MART-10.
